# Supplementary material for: The effect of written text on comprehension of spoken English as a foreign language: A replication study
Source: publisher site journal article supplement (doi:10.1515/iral-2018-0350), 2019-10-30
Supplement: Supplementary file 1 [file Supplementary Appendixes.pdf › Supplementary Appendixes.pdf]

## Appendixes

### Appendix 1-Background Information Questionnaire

1.1 Name (姓名): \_\_\_\_\_ Student ID (学号): \_\_\_\_\_ Gender (性别): \_\_\_\_\_

1.2 Age (年龄): \_\_\_\_\_ Age onset of English (几岁开始学习英语): \_\_\_\_\_

1.3 Years of Learning (学了多少年): \_\_\_\_\_

1.4 Current Educational Status and major (目前是大学几年级及专业): \_\_\_\_\_

1.5 English Level (请自我评估并勾选自己的英语水平):

|           | Poor<br>(初级) | Fair<br>(一般) | Good<br>(中等) | Very Good<br>(良好) | Excellent<br>(高级) |
|-----------|--------------|--------------|--------------|-------------------|-------------------|
| Listening |              |              |              |                   |                   |
| Speaking  |              |              |              |                   |                   |
| Reading   |              |              |              |                   |                   |
| Writing   |              |              |              |                   |                   |

1.6 English Proficiency Test in China 英语等级考试证书以及成绩 (如有): \_\_\_\_\_

1.7 First Language excluding dialects (母语不含方言): \_\_\_\_\_

Second Language and Third Language (第二语言以及第三语言): \_\_\_\_\_

### Appendix 2-Translation Task

Translate the following 10 words into Chinese. Write down all the meanings you know of the words in respect of the specified part of speech (e.g., for "Cry v.," you only need to explain it as a verb, 哭, 喊). 请写出下面 10 个词相应词性下的你所知道的其中文意思。比如 Cry 动词, 你只需写出哭, 喊即可。

1. Approximately adv. \_\_\_\_\_

2. Cultivate v. \_\_\_\_\_

3. Prune v. \_\_\_\_\_

4. Bud v. \_\_\_\_\_

5. Mature adj. \_\_\_\_\_

6. Bloom v. \_\_\_\_\_

7. Bunch n. \_\_\_\_\_

8. Fragrance n. \_\_\_\_\_

9. Process v. \_\_\_\_\_

10. Sour adj. \_\_\_\_\_

### Appendix 3-Subjective Mental Load Rating

*How easy or difficult was the passage for you to understand?* 第一次听这段听力之后，你觉得该听力的难度如何？请勾选出来：)

| Extremely Easy<br>(极难) | Very Easy<br>(非常难) | Moderately Easy<br>(中等难度) | Slightly Easy<br>(稍难) | Neither Easy nor Difficult<br>(不难不易) |
|------------------------|--------------------|---------------------------|-----------------------|--------------------------------------|
|                        |                    |                           |                       |                                      |

| Slightly Difficult<br>(稍简单) | Moderately Difficult<br>(中等难度) | Very Difficult<br>(非常简单) | Extremely Difficult<br>(极其简单) |
|-----------------------------|--------------------------------|--------------------------|-------------------------------|
|                             |                                |                          |                               |

### Appendix 4-The Listening Materials

#### <Coffee Trees>

There are approximately 60 types of coffee trees, but only ten of them are cultivated in large numbers in the world. They are a bit hard to grow, but once they are established, they can live for 100 years. The coffee tree generally grows to between 3 and 5 meters high and some can grow to about 10 meters. However, the tree is always pruned to around 2 meters in height to permit regular flowering and easier harvesting. The leaves of the tree vary in colour at different stages: yellow when first budding, clearer green when young, and a dark green when mature. Once the leaves fall, they never grow back. But leaves can grow on new branches. After three or four years, a tree reaches adult age and is then able to produce flowers. The flowers are white, bloom in groups of 8 to 15 bunches, and give out a light fragrance. The flower blooms for 7 months and then produces a fruit called a cherry. Coffee is only made from the cherry. The cherry has to be processed within a few hours of being picked. Otherwise, coffee made from the cherry will be sour.

#### <Roses>

Roses are famous for their beauty and fragrance. They are mass planted and sold all through the year in nearly all the flower shops all over the world. A bunch of roses always makes a wonderful gift to express love and care. Rose plants also appear in gardens in small numbers.

They make gardeners especially proud when they bloom. Besides, roses can be processed for many purposes. Rose oil and rose water made from roses are highly valued in skincare. Roses are generally easy to cultivate. Great care should be taken at planting time. Winter is the season for planting roses and they must be planted in sunny places. Roses need plenty of sunlight, at least 5 to 6 hours a day. The place must also be protected from cold wind. Otherwise, they are easily destroyed before they become mature. The newly planted roses should be watered regularly. Generally, the water they need is 3 centimetres of rain per week. When established, roses need to be pruned in early spring and summer. Spring pruning occurs when the plant begins to bud but before leaves appear. The main purpose is to get rid of the old branches that no longer produce flowers. Summer pruning includes cutting dead flowers. Then the plant can bloom for another round.

## **Appendix 5—Scoring Criteria**

### **<Coffee Trees>-12 General units**

There are approximately 60 types of coffee trees. / Only ten of them are cultivated in large numbers. / They are a bit hard to grow. / The coffee tree generally grows to between 3 and 5 meters high. / The tree is always pruned to around 2 meters. / The leaves of the tree vary in colour at different stages. / Once the leaves fall, they never grow back. / After three or four years, a tree reaches adult age. / It is then able to produce flowers. / The flowers produce a fruit called a cherry. / Coffee is only made from the cherry. / The cherry has to be processed within a few hours of being picked.

### **<Roses>-11 General units**

Roses are famous for their beauty and fragrance. / They are planted in large number and sold in nearly all the flower shops. / Rose plants also appear in gardens in small numbers. / Roses are generally easy to cultivate. / Great care should be taken at planting time. / Winter is the season for planting roses. / They must be planted in sunny places. / The place must also be protected from cold wind. / The newly planted roses should be watered regularly. / Roses need to be pruned in early spring and summer.
